# Supplementary material
Source: Springer Nature journal article supplement (https://mijn.bsl.nl/resource/supplementary/13047_2013_781_MOESM3_ESM.pdf/7113076)

**(a) MED**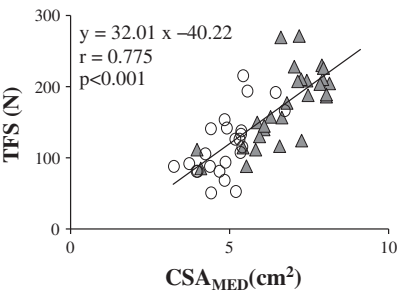**(b) LAT**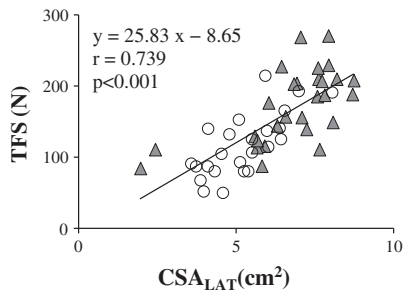**(c) ADH**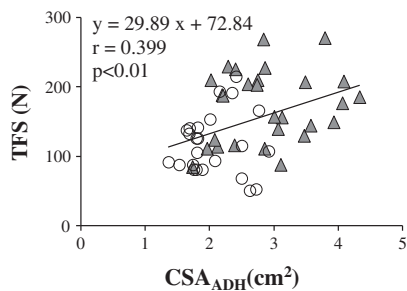**(d) FHL**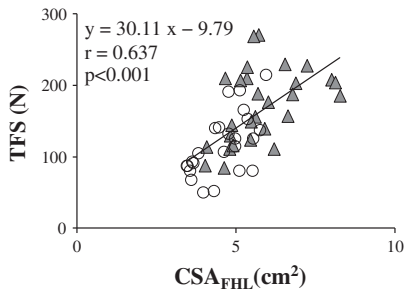**(e) FDL**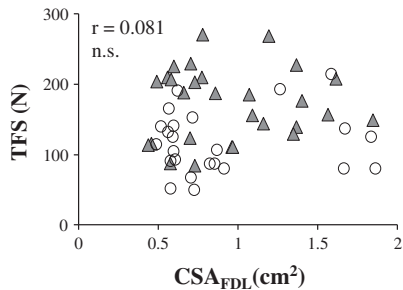

Supplement: MOESM3 [file 7113076]
